# Supplementary material for: Mixed-Linkage Glucan Is the Main Carbohydrate Source and Starch Is an Alternative Source during Brachypodium Grain Germination
Source: MDPI journal article supplement (doi:10.3390/ijms24076821), 2023-04-06
Supplement: s1 [file s1]

Supplementary Figure S1

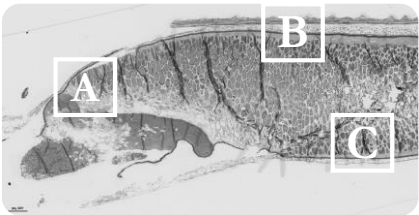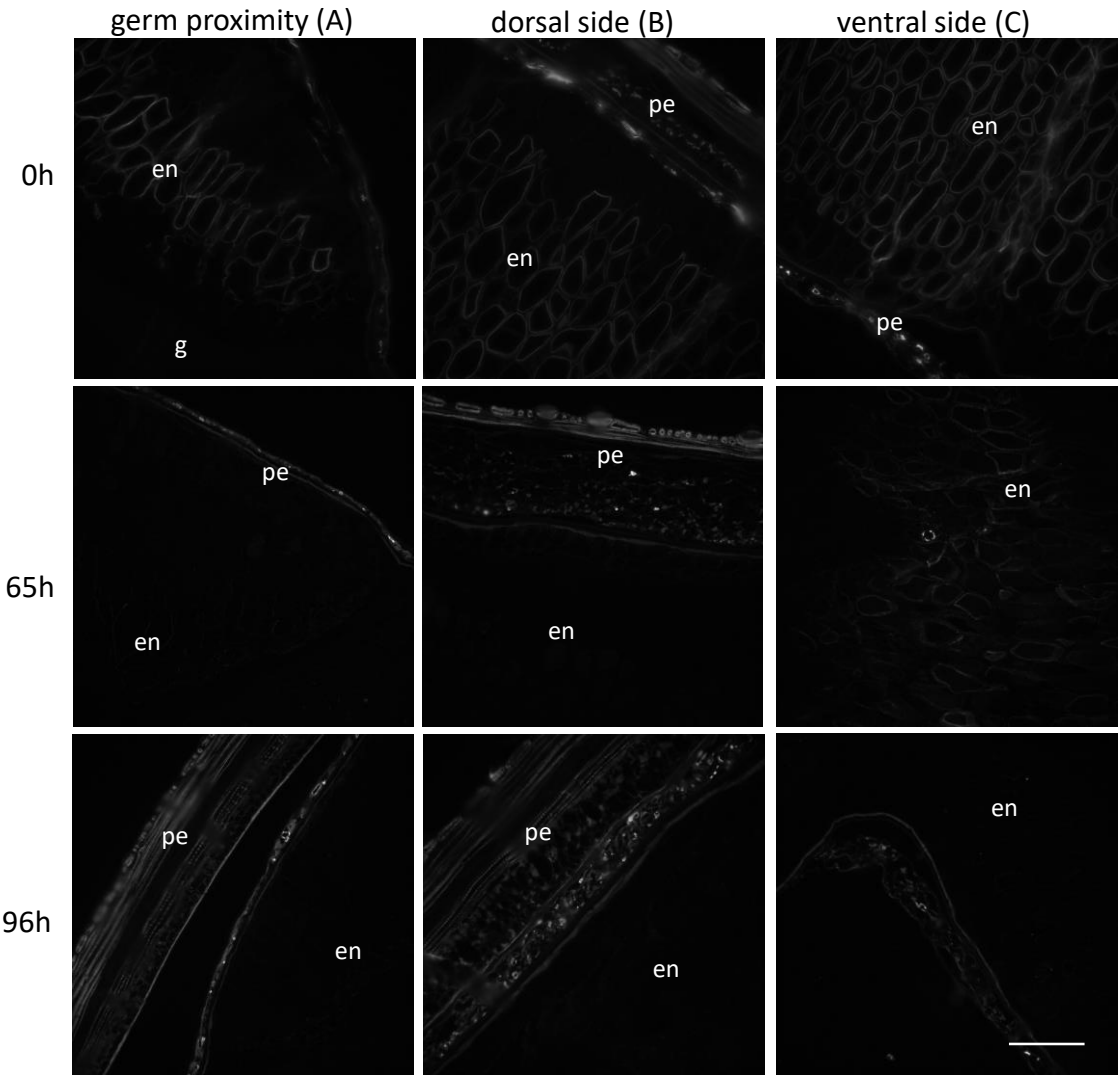

Immunolabeling control of wild type germinated grains (0, 65 and 96 hours after imbibition) pretreated with lichenase to remove MLG and using antibodies specific to MLG. Scale bar = 50µm. g : germ; pe : pericarp; en : endosperm.

Supplementary Figure S2

|                               | GH17         |              |              |              |              | GH51         | GH9          | GH16         | GH13         | CSLF6        | CSLH1        |
|-------------------------------|--------------|--------------|--------------|--------------|--------------|--------------|--------------|--------------|--------------|--------------|--------------|
|                               | Bradi2g22222 | Bradi2g22224 | Bradi2g22226 | Bradi2g60490 | Bradi2g27140 | Bradi4g43710 | Bradi5g14580 | Bradi1g27867 | Bradi3g58010 | Bradi3g16307 | Bradi5g10130 |
| Pre-anthesis ovary            | 0.0          | 0.0          | 0.0          | 0.2          | 3.0          | 38.0         | 50.0         | 0.4          | 0.2          | 316.0        | 0.3          |
| Young grain (1-3 DAA)         | 0.0          | 0.0          | 0.0          | 4.0          | 29.0         | 77.0         | 64.0         | 0.8          | 0.5          | 397.0        | 0.2          |
| Middle length grain (3-8 DAA) | 0.0          | 0.0          | 0.0          | 0.2          | 9.0          | 75.0         | 76.0         | 2.0          | 3.0          | 819.0        | 0.1          |
| Full length grain (8-15 DAA)  | 0.0          | 0.0          | 0.0          | 0.1          | 27.0         | 62.0         | 89.0         | 4.0          | 12.0         | 940.0        | 0.1          |
| Mature grain (15-20 DAA)      | 0.8          | 2.0          | 0.0          | 3.0          | 149.0        | 981.0        | 46.0         | 1.0          | 1.0          | 536.0        | 1.0          |
| Mature grain without embryo   | 0.1          | 0.6          | 0.1          | 6.0          | 84.0         | 1000.0       | 33.0         | 2.0          | 2.0          | 618.0        | 0.9          |
| Germinating grain             | 1052.0       | 2847.0       | 1520.0       | 849.0        | 329.0        | 1161.0       | 219.0        | 56.0         | 2223.0       | 213.0        | 2.0          |
| Young seedling                | 0.1          | 2.0          | 4.0          | 19.0         | 468.0        | 46.0         | 148.0        | 43.0         | 0.2          | 498.0        | 10.0         |

expression<40

40<expression<100

100<expression<400

400<expression<800

800<expression<1500

expression>1500

Expression level (average expression values) of genes putatively involved in sugar metabolism of *Brachypodium* grain according to the *Brachypodium distachyon* eFP Browser (<http://bar.utoronto.ca>; Sibout et al., 2017 [35])

**Supplementary Table S1**  
 Primer lists used for gene cloning and qRT-PCR

|                          | Accession    | Forward primers               | Reverse primers                 |
|--------------------------|--------------|-------------------------------|---------------------------------|
| primers used for cloning | Bradi2g22222 | CCGGAATTCATCGGCGTGTGCTACGGC   | GCTCTAGAGCAAATTTGATGGGGTAGATGTG |
|                          | Bradi2g22224 | CCGGAATTCATCGGGGTGTGCTACGGC   | GCTCTAGAGCCCAGAAGCTGAGGGGGTAGAC |
|                          | Bradi2g22226 | CCGGAATTCATCGGGGTGTGCTACGGC   | GCTCTAGAGCCCAGAAGCTGATGGAGTAGAC |
| primers used for qPCR    | Bradi2g22222 | CCAAAAGGCGTGGAGTCCATC         | AGGCTGGCAAGCATGTCGTT            |
|                          | Bradi2g22224 | CCAAAAGCGTGGAGTCCATCG         | CGACGACGTTGATGCCACTGC           |
|                          | Bradi2g22226 | CCAAAAGCGTGGAAATCCATCG        | TAGCGTGGGCAGCACGTCGTT           |
|                          | Bradi2g27140 | CACAAAGCGTGGAGTCGATCG         | ATGTTGGAGAGCACGTCGTT            |
|                          | Bradi2g60490 | CTGTTCTACGAGCGTGCAATC         | GGCGATGTACTTGATGTTGACC          |
|                          | Bradi4g43710 | GAT AAC GAT CGC ACG TGG AAC C | CCGAAGTTCACAATCTTCACTCT         |
|                          | Bradi5g14580 | ACGCCCAGAAATCCGGCAAG          | CCCTCACATGGTCGTACTIONGC         |
|                          | Bradi1g27867 | GGCTTTCTACCTGTCGAACAACG       | CAGAGGTGGAAGCGCATCTC            |
|                          | Bradi3g58010 | ACAAGGTCATGCAGGGCTAC          | AGGTGCTCGATCTCCTCCTT            |
|                          | PP2A         | AGCGCTGGTGAATCTGAAA           | TGGACACGATCTAAGCACCG            |
|                          | SDH          | TTCAACAGCATGGATGGCC           | ATCTTCGGTTGCAGAGCTCCT           |

Supplementary Figure S3

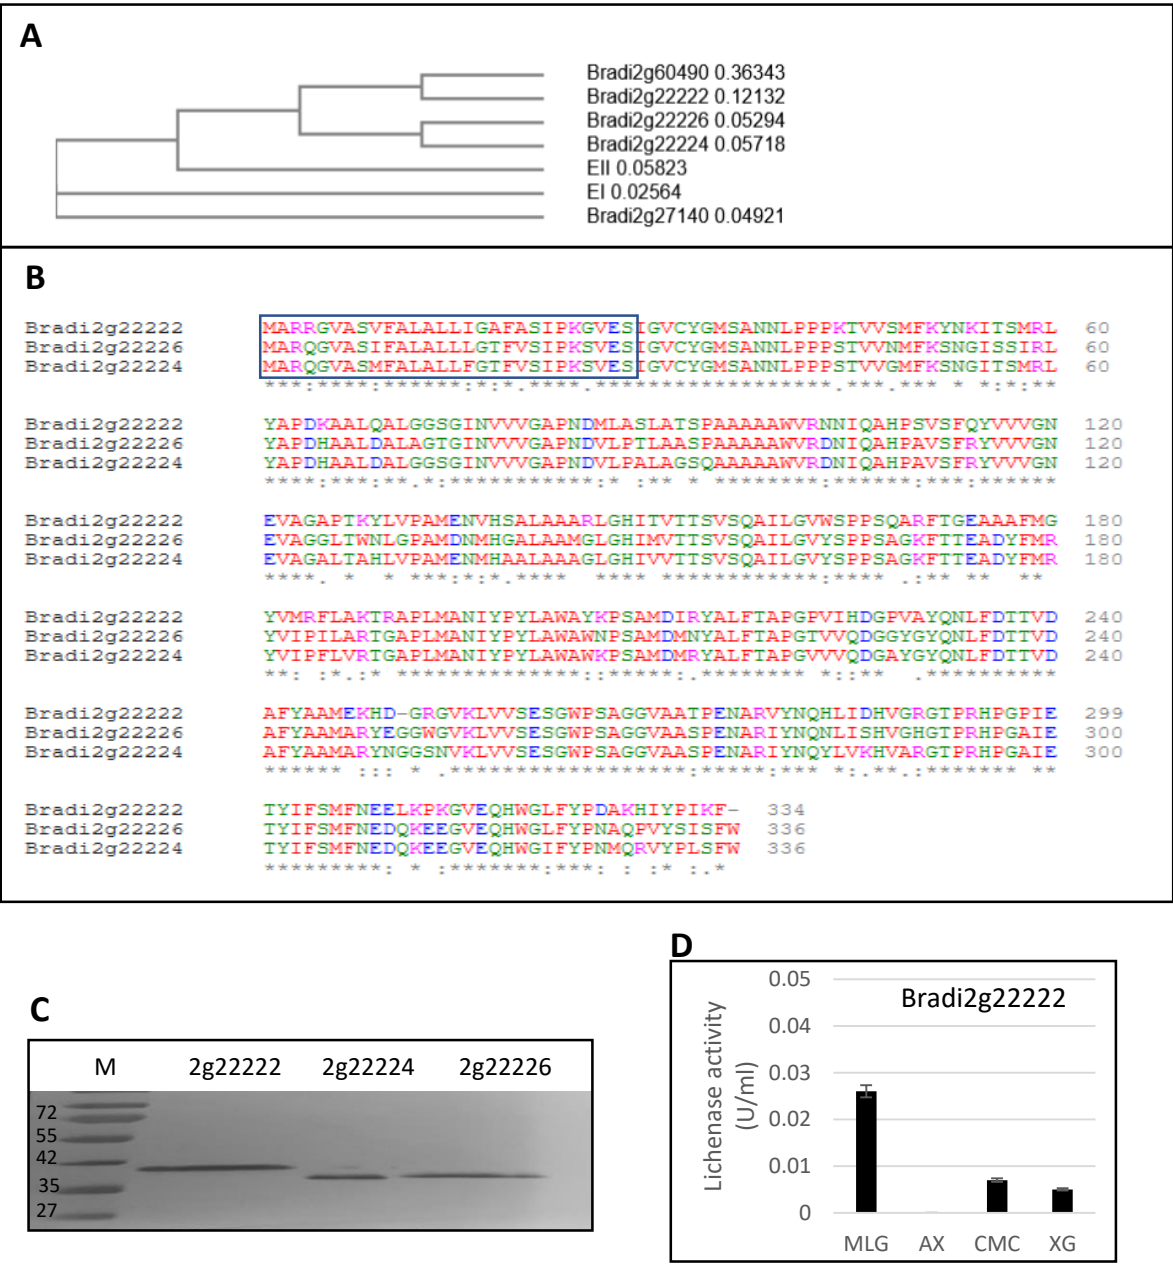

**Lichenase information : phylogenetic tree, multiple alignment, western blot of recombinant lichenases, substrate specificity of Bd2g22222.** **A.** Phylogenetic tree (<https://www.ebi.ac.uk>). EI : HORVU7Hr1G057680 ; EII : HORVU7Hr1G120450. **B.** Sequence alignment of three lichenases from the GH17 family using Clustal O (1.2.4) multiple sequence. Signal peptides is highlighted in a rectangular box. Amino acids are coloured according to their chemical properties (blue : acidic; red : small and hydrophobic ; magenta : basic ; green: hydroxyl, sulhydryl, amine and G). Asterisk significance : “\*” indicates positions which have a single, fully conserved residue; “:” indicates conservation between groups of strongly similar properties; “.” indicates conservation between groups of weakly similar properties. **C.** Western blot analysis of recombinant lichenases Bradi2g22222, Bradi2g22224 and Bradi2g22226 produced in *Pichia pastoris*. M : molecular weight marker (kDa). **D.** Enzymatic activity measurement of the recombinant enzyme Bradi2g22222 (MLG : barley mixed-linkage glucan; AX : wheat arabinoxylans; XG : tamarin xyloglucan, CMC : carboxymethylcellulose).

A

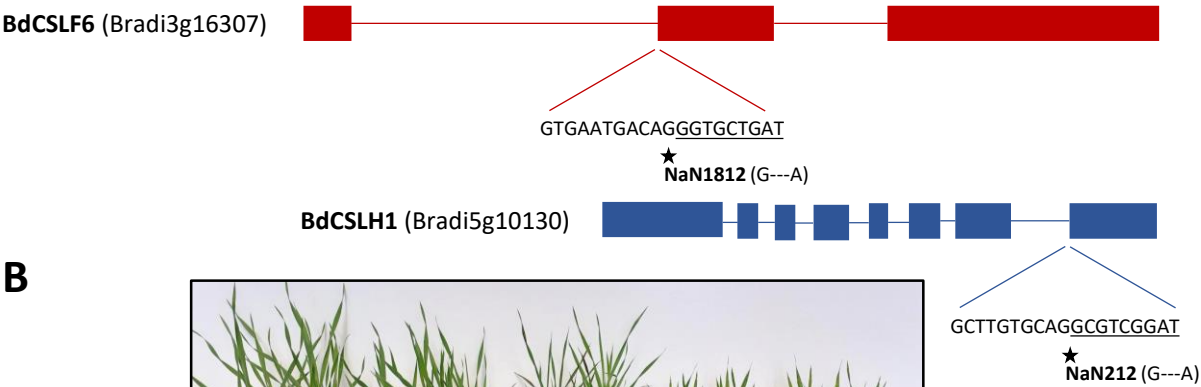

B

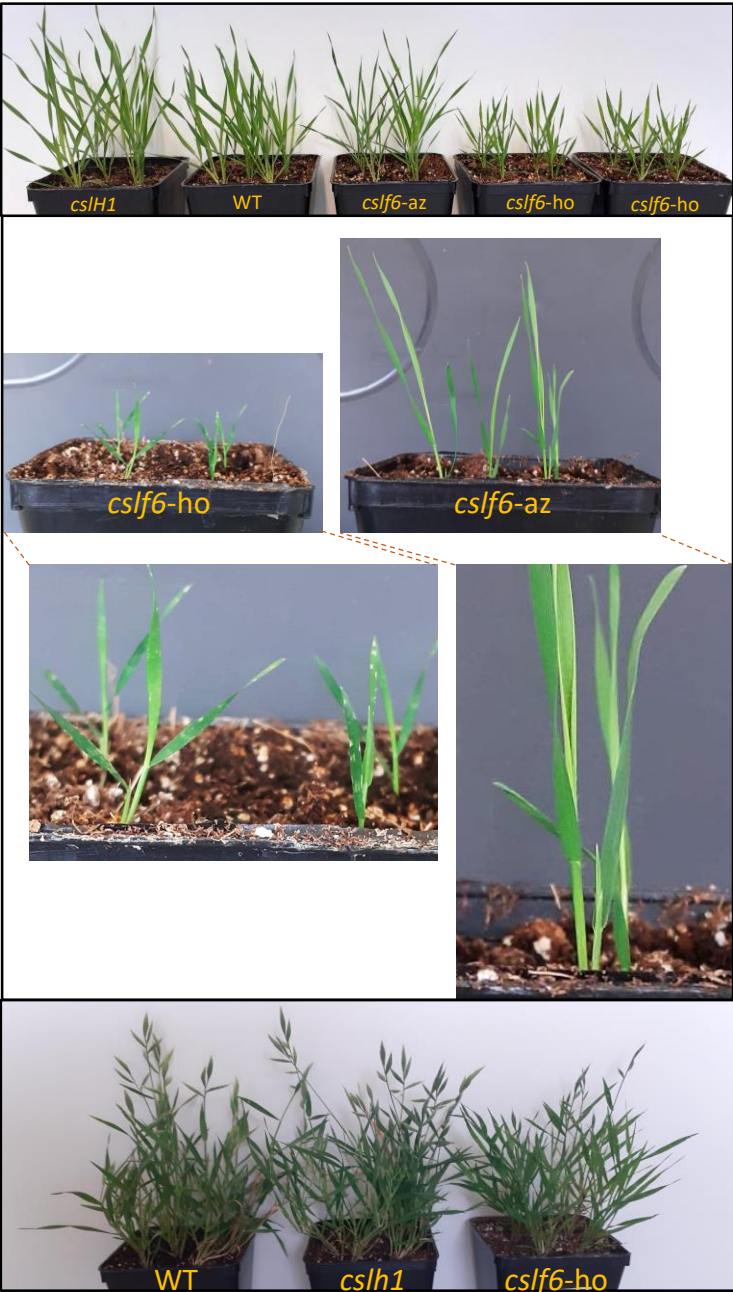

**A.** Schematic of Brachypodium *CSLF6* and *CSLH1* genes. Plain boxes correspond to exon sequences, and lines correspond to intron sequences. Asterisk indicates the mutation location.

**B.** Brachypodium plants of WT, *cslh1* mutant, azygous and homozygous *csIf6* mutants showing young (top) and advanced growth (bottom), with magnifications (in the middle of the figure) highlighting leaf damage of the homozygous *csIf6* mutant.

Supplementary Figure S5

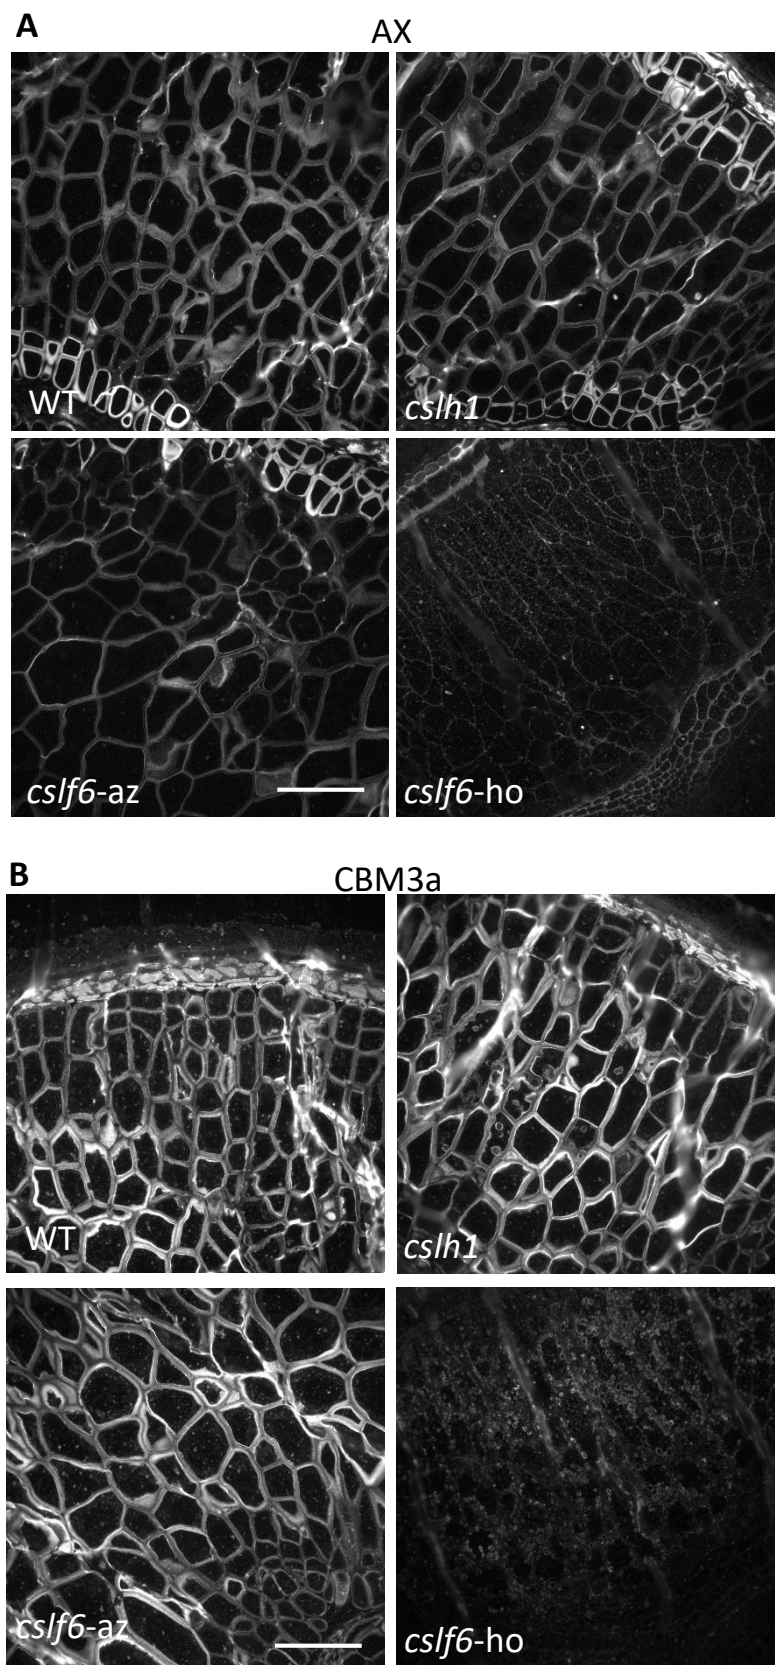

Fluorescence labeling of arabinoxylans and cellulose in grain cross-sections of WT, *cslh1*, homozygous and azygous *cslf6* mutants (15 days after flowering) pre-treated with lichenase, using AX1 antibodies (**A**) and CBM3a (**B**). Scale bar=50μm.

## Supplementary Figure S6

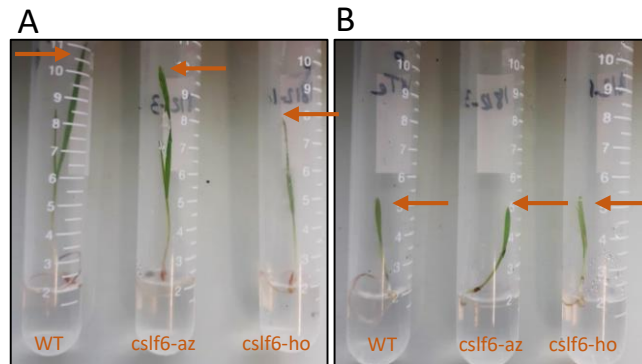

***In vitro* culture of WT and *csif6* mutants.** Growth of plants on a phytigel medium from 8 days seedlings with seeds (A) or without seeds (B) on a phytigel medium (in light, without nutrient) during 6 days. n=15.
